# Supplementary material for: Niacin therapy and the risk of new-onset diabetes: a meta-analysis of randomised controlled trials
Source: HighWire-hosted journal article supplement (doi:10.1136/heartjnl-2015-308055), 2015-09-14

## Supplementary material

### Goldie C et al, Niacin therapy and the risk of new-onset diabetes: a meta-analysis of randomised controlled trials

**eFigure 1.** Data request sheet for niacin trials (page 2)

**eFigure 2.** Funnel plot of the eleven trials with 95% confidence intervals (page 3)

**eFigure 3.** Sensitivity analysis on trials that did/ did not use laropiprant (page 4)

**eFigure 4.** Sensitivity analysis on trials that did/ did not use background statin therapy (page 5)

**eFigure 1.** Data request sheet for niacin trials

**From David Preiss  
University of Glasgow**

**Data request for niacin incident diabetes meta-analysis:**

Thank you for approving our request to join this meta-analysis. The following is a summary of the data required to enable us to incorporate data from your trial into the meta-analysis. We do not require all data; the most important is for the numbers developing diabetes. Some studies have access to all three methods to diagnose diabetes and some to only one of the three; this is not problematic and will be highlighted in the resulting manuscript.

Essential data

1. Total number of non-DM subjects at baseline:
  - a. Niacin:
  - b. Placebo:
  
2. Methods of diagnosis of diabetes – which of the following were available?  
(please state *yes / no* as appropriate)
  - a. Physician reported (i.e adverse event report): \_\_\_\_
  - b. Commencement of oral diabetes medication or insulin: \_\_\_\_
  - c. Two elevated fasting plasma glucose values ( $\geq 126$ mg/dL or 7.0mmol/L): \_\_\_\_
  
3. Number developing diabetes in each group:
  - a. Niacin: \_\_\_\_
  - b. Placebo: \_\_\_\_

Additional data

4. Age (mean) of all non-DM participants at baseline: \_\_\_\_
  
5. BMI (mean) of all non-DM participants at baseline: \_\_\_\_
  
6. Follow up duration (mean): \_\_\_\_

**eFigure 2.** Funnel plot of the eleven trials with 95% confidence intervals

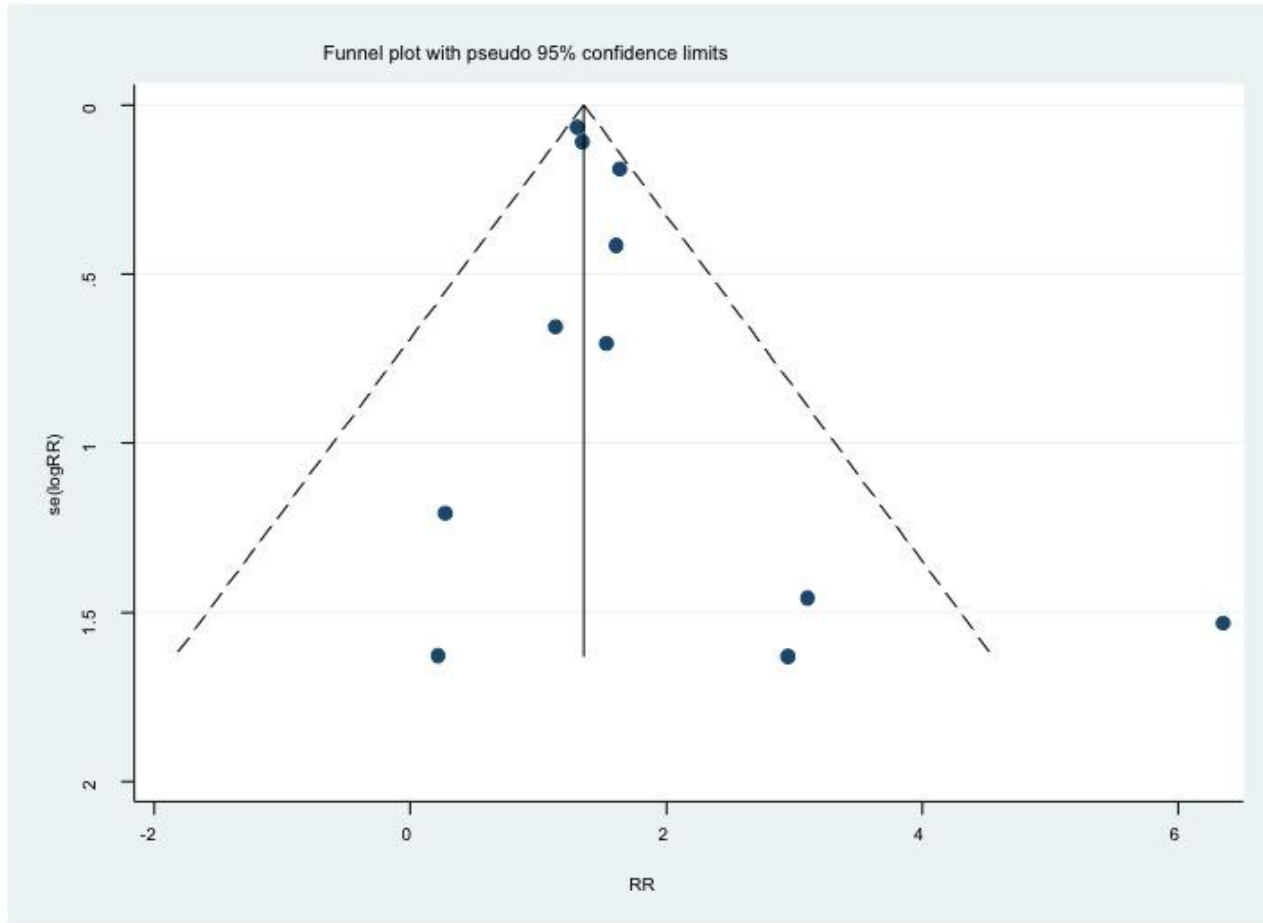

**eFigure 3.** Sensitivity analysis on trials that did/ did not use laropiprant

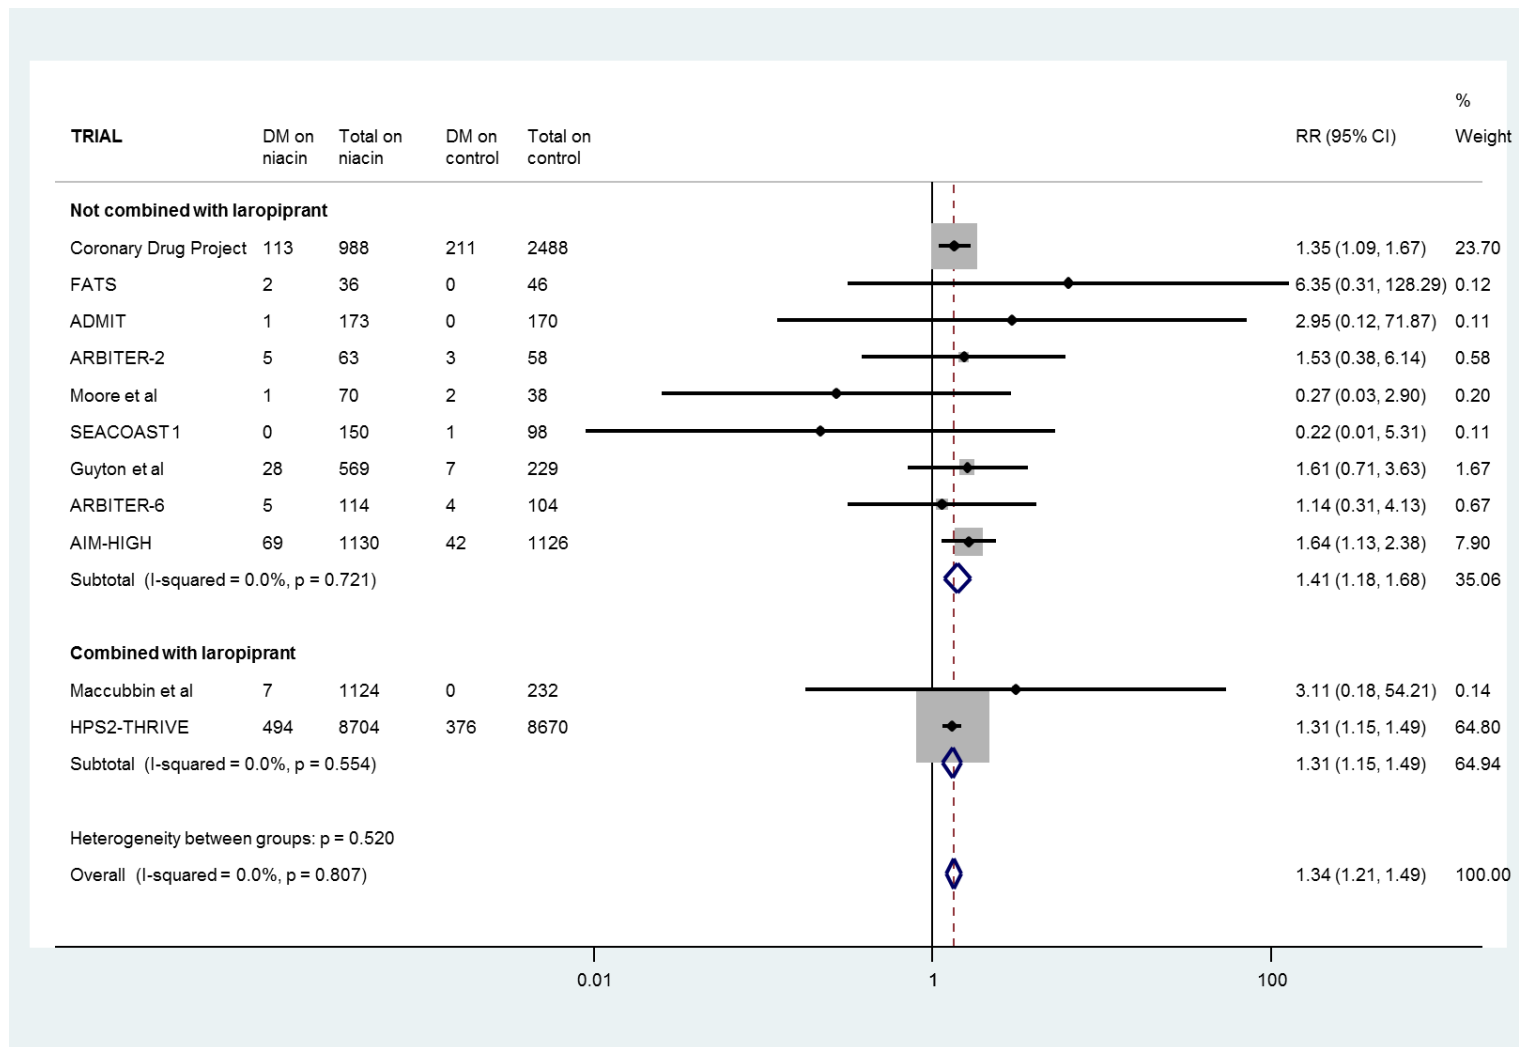

**eFigure 4.** Sensitivity analysis on trials that did/ did not use background statin therapy

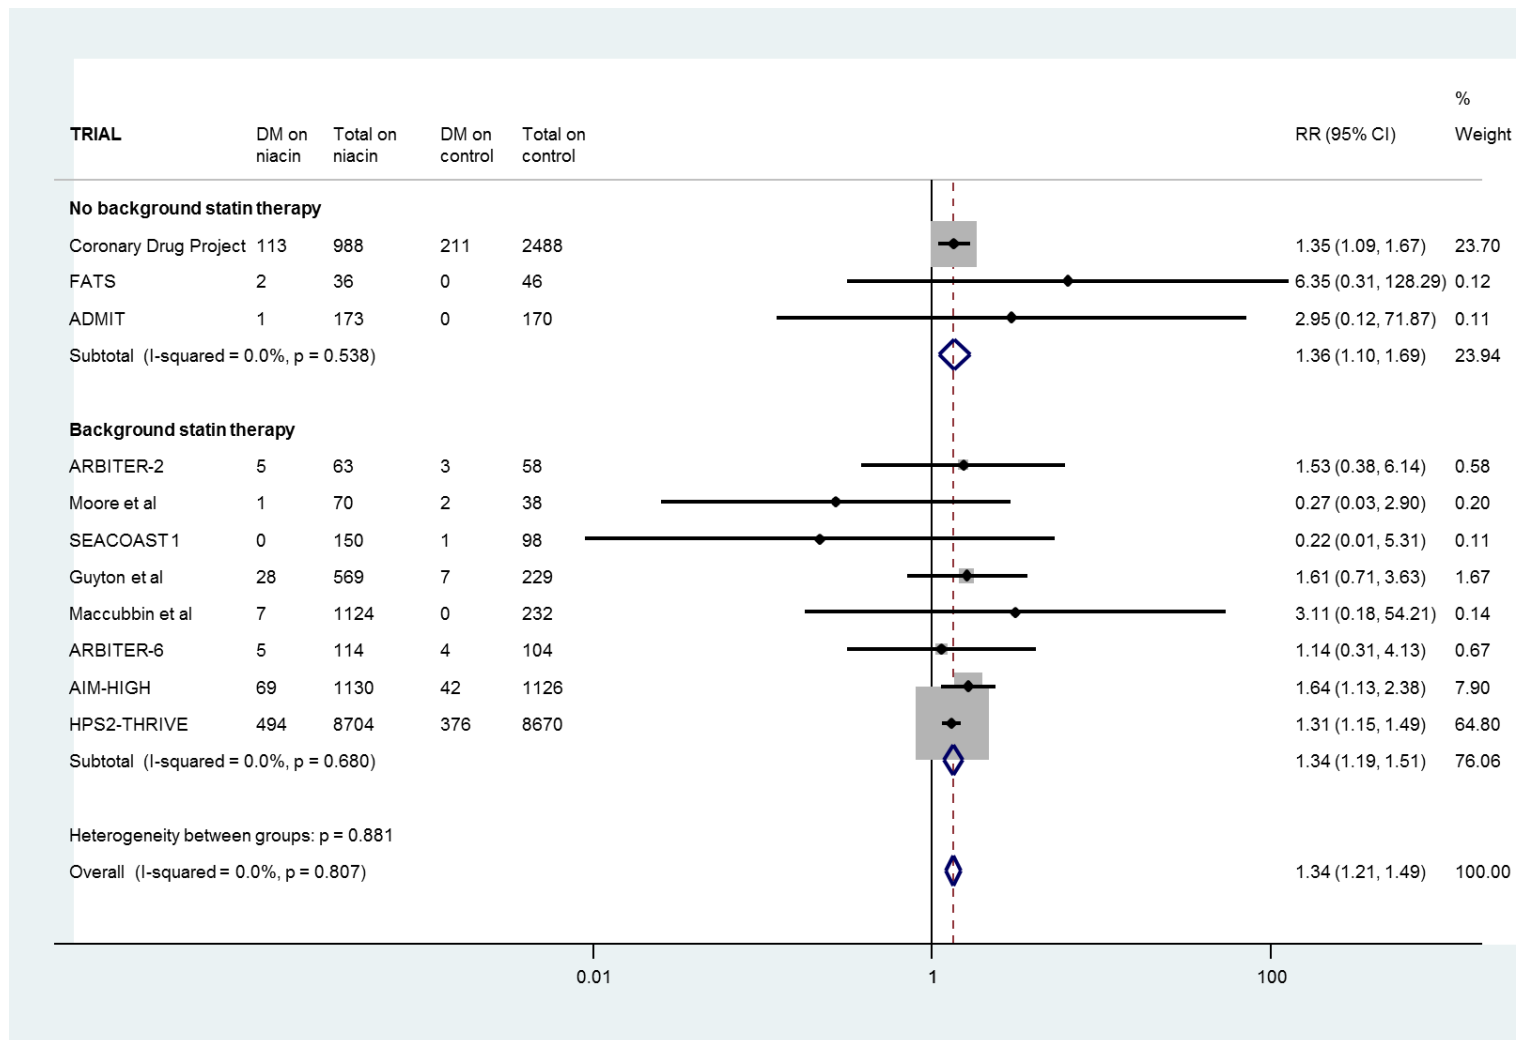

Supplement: heartjnl-2015-308055supp.pdf [file heartjnl-2015-308055supp.pdf]
